# Supplementary material
Source: PubMed Central journal article supplement (PMC4277764)
Supplement: ja508359n_si_001.pdf [file ja508359n_si_001.pdf]

## **Supporting Information**

### **Bacteriorhodopsin folds through a poorly organized transition state**

Jonathan P. Schlebach, Nicholas B. Woodall, James U. Bowie, and Chiwook Park

### **Appendices**

Derivation of Eq. 2.

Proof that  $\lambda_1 > k_h$  and  $\lambda_2 < k_h$ .

### **Supplementary Figures**

Figure S1. Residuals from curve-fitting of bR unfolding

Figure S2. Kinetics of retinal hydrolysis.

Figure S3. Folding and unfolding kinetics of I119A bR.

Figure S4. Refolding of F219A bR.

Figure S5. The extracted rates constants of the bR mutants used for  $\phi$ -value analysis.

Figure S6. Lack of dependence of the folding and unfolding behavior of bR on the degree of destabilization upon mutation.

## Appendices

*Derivation of Eq. 2.* When a system is comprised of three species interconverting through unimolecular reactions, the relaxation of the system proceeds with two macroscopic rate constants ( $\lambda_1$  and  $\lambda_2$ ), which are solutions of the following equation:

$$\begin{vmatrix} \lambda - (k_{12} + k_{13}) & k_{21} & k_{31} \\ k_{12} & \lambda - (k_{21} + k_{23}) & k_{32} \\ k_{13} & k_{23} & \lambda - (k_{31} + k_{32}) \end{vmatrix} = 0. \quad (\text{S1})$$

In Eq. S1,  $k_{ij}$  is the microscopic rate constant for the conversion from the  $i$ -th species to the  $j$ -th species. The kinetic mechanism of bR unfolding and refolding involves three species (bR<sub>F</sub>, bR<sub>U</sub>, and bO) with three kinetic constants ( $k_f$ ,  $k_u$ , and  $k_h$ ). By replacing  $k_{12}$ ,  $k_{21}$ , and  $k_{23}$  with  $k_u$ ,  $k_f$ , and  $k_h$ , respectively, and set other kinetic constants to 0, Eq. S1 is applied to the kinetic mechanism of bR unfolding and folding.

$$\begin{vmatrix} \lambda - k_u & k_f & 0 \\ k_u & \lambda - (k_f + k_h) & 0 \\ 0 & k_h & \lambda \end{vmatrix} = 0, \quad (\text{S2})$$

Eq. S2 can be arranged into a quadratic equation:

$$\lambda^2 - (k_f + k_u + k_h)\lambda + k_u k_h = 0 \quad (2)$$

*Proof that  $\lambda_1 > k_h$  and  $\lambda_2 < k_h$ .* A quadratic function  $f(\lambda)$  can be defined using Eq. 2:

$$f(\lambda) = \lambda^2 - (k_f + k_u + k_h)\lambda + k_u k_h$$

When  $\lambda = k_h$ ,

$$f(k_h) = k_h^2 - (k_f + k_u + k_h)k_h + k_u k_h = -k_f k_h \quad (\text{S3})$$

Because  $k_f$  and  $k_h$  have non-zero positive values, the left side of Eq. S3 should have a negative value, which indicates that  $f(k_h) < 0$ . Because the graph of the function has an upward curvature,  $k_h$  is between the two roots of the equation  $f(\lambda) = 0$ . As  $\lambda_1$  and  $\lambda_2$  are defined to be the macroscopic rate constant for the fast phase and the slow phase, respectively,  $\lambda_1$  is greater than  $\lambda_2$ . Therefore,  $\lambda_1$  is greater than  $k_h$  and  $\lambda_2$  is smaller than  $k_h$ .

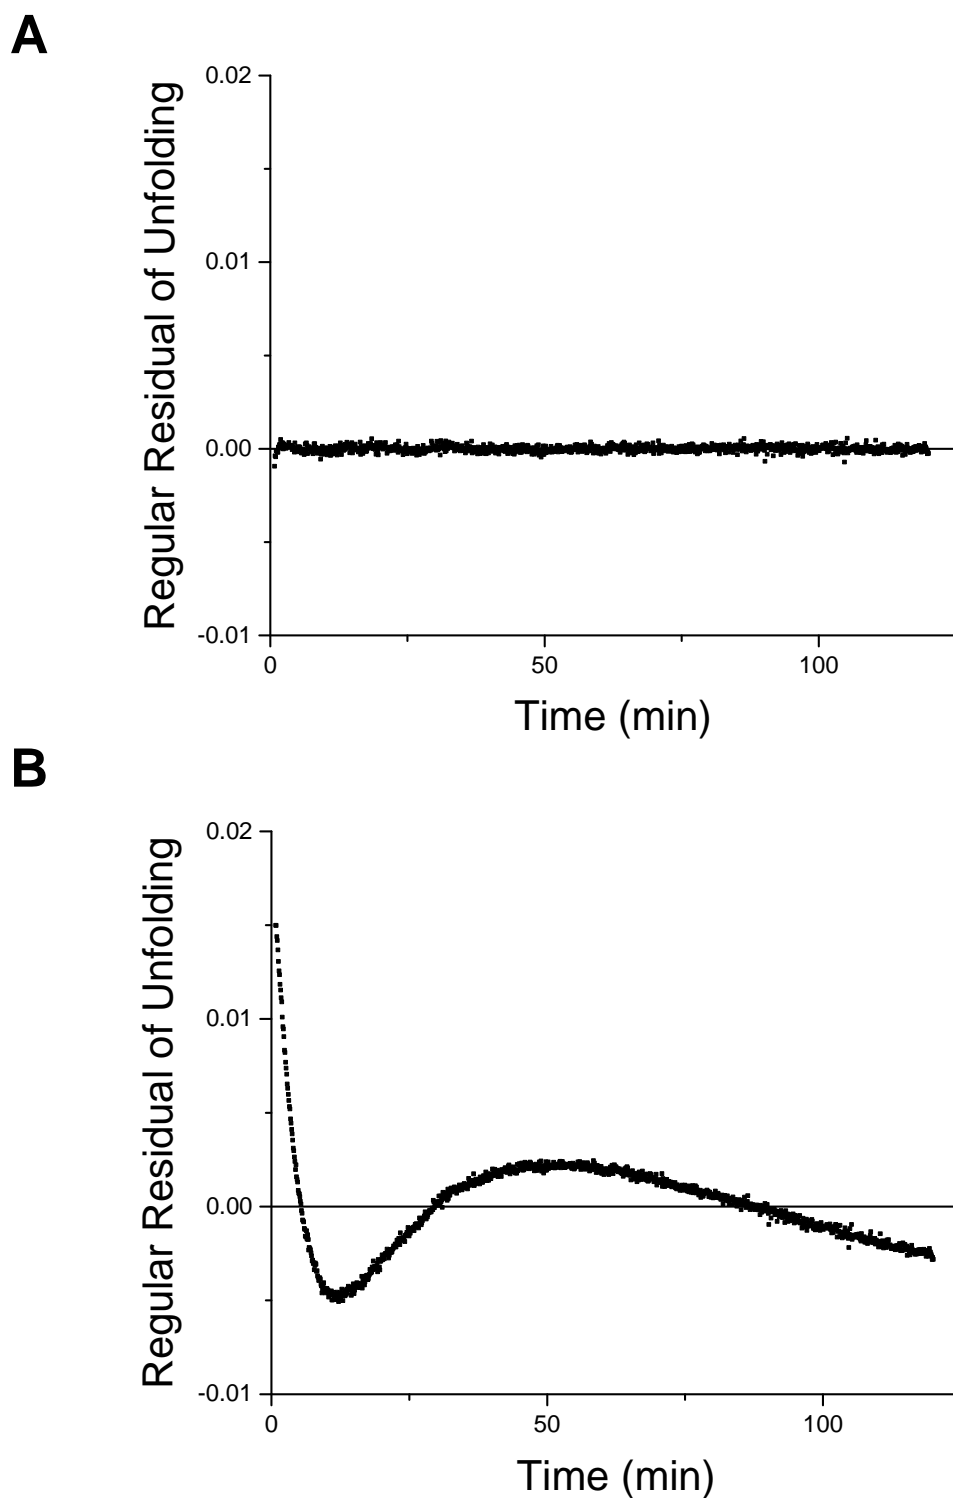

**Figure S1. Residuals from curve-fitting of bR unfolding** (A) The residuals from fitting the unfolding of  $bR_F$  at  $X_{SDS} = 0.73$  with a double exponential equation. (B) The residuals from fitting the unfolding of  $bR_F$  at  $X_{SDS} = 0.73$  with a single exponential equation.

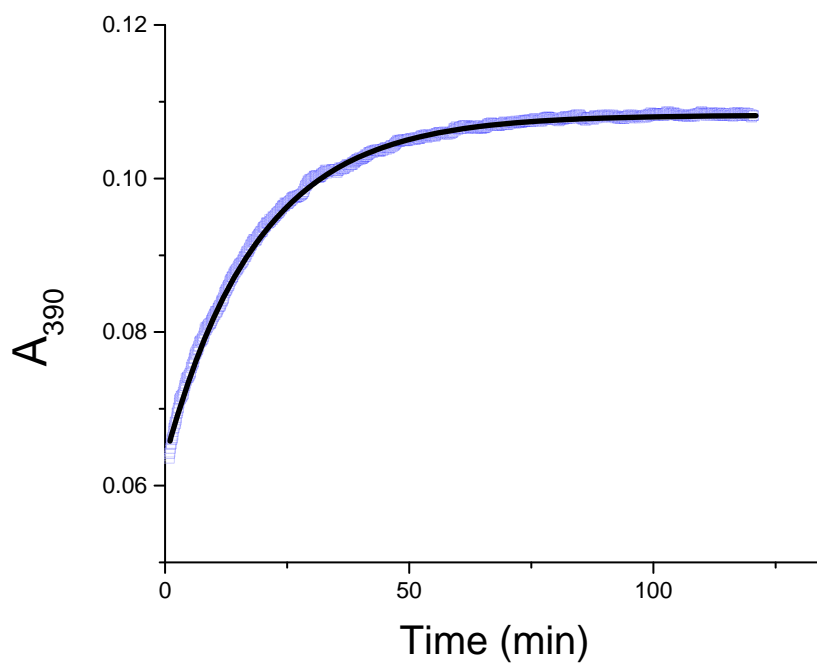

**Figure S2. Kinetics of retinal hydrolysis.** A single exponential fit (black) of the hydrolysis of retinal from bR<sub>U</sub> at  $X_{\text{SDS}} = 0.83$  as monitored by the increase at  $A_{390}$  (blue squares).

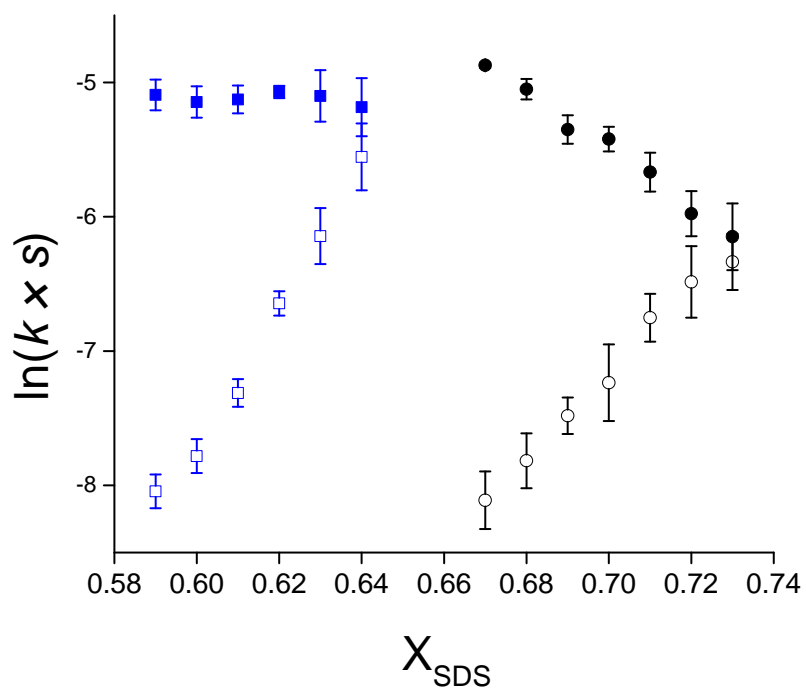

**Figure S3. Folding and unfolding kinetics of I119A bR.** The large shift in the folding slope indicates the change in the folding pathway of I119A bR. The natural log of  $k_f$  (filled blue squares) and  $k_u$  (open blue squares) of the bR mutant I119A is plotted with the natural log of  $k_f$  (filled black circles) and  $k_u$  (open black circles) of wild-type bR for reference.

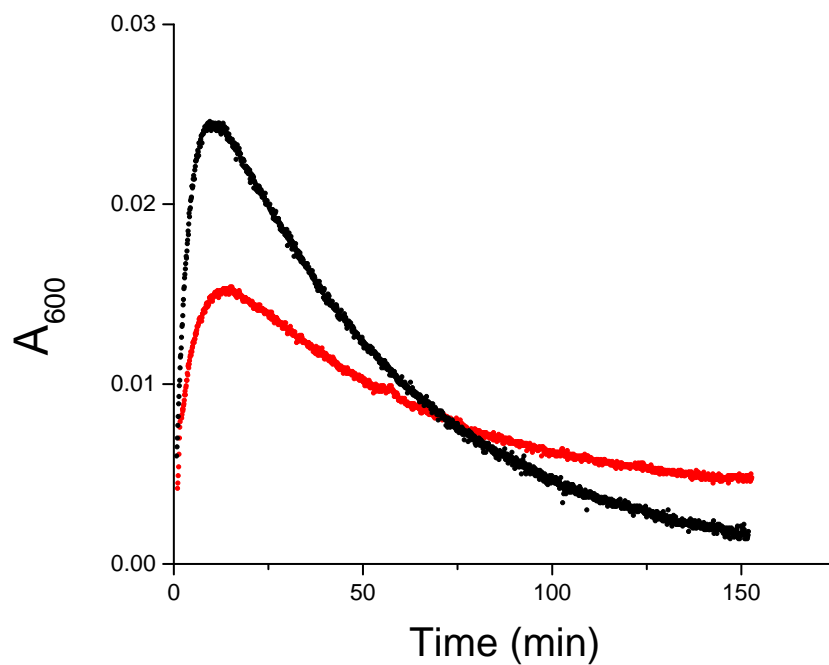

**Figure S4. Refolding of F219A bR.** The change in the kinetic trace shows the change in folding pathway in F219A bR. The refolding trace of the F219 A bR at  $X_{\text{SDS}} = 0.67$  (red dots) is plotted with that of wild-type bR at  $X_{\text{SDS}} = 0.73$  (black dots) for reference.

**A**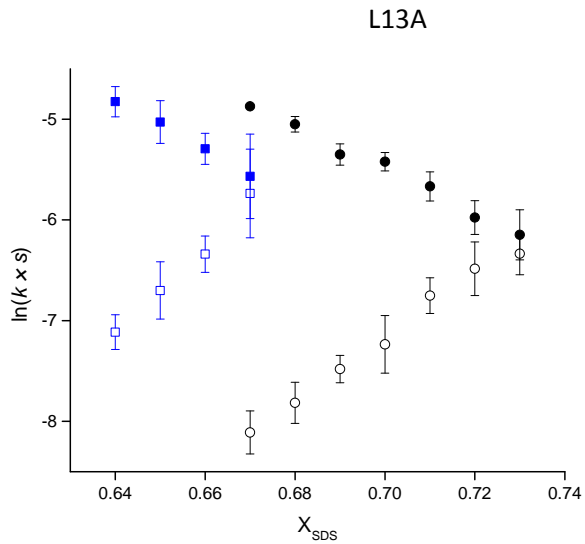**B**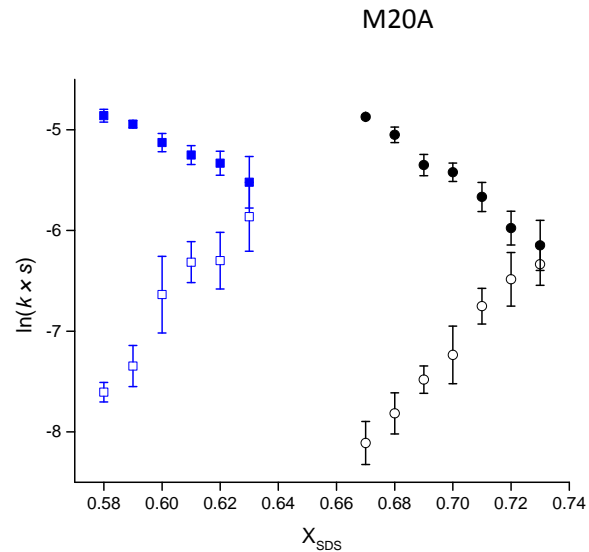**C**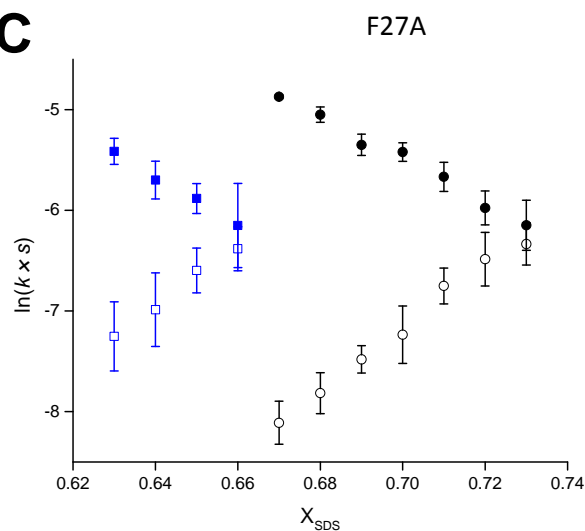**D**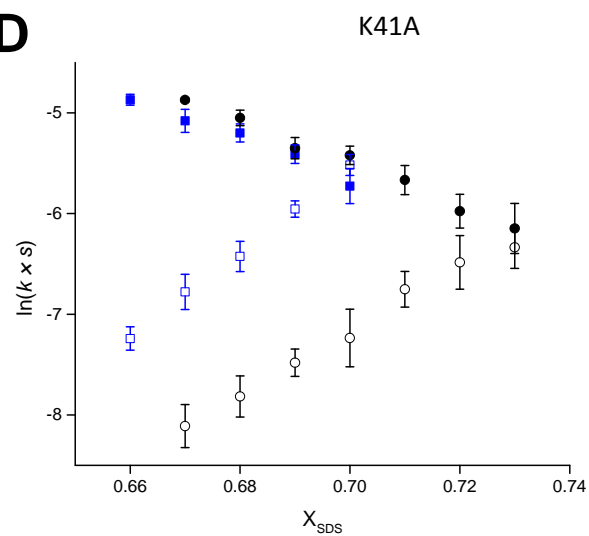**E**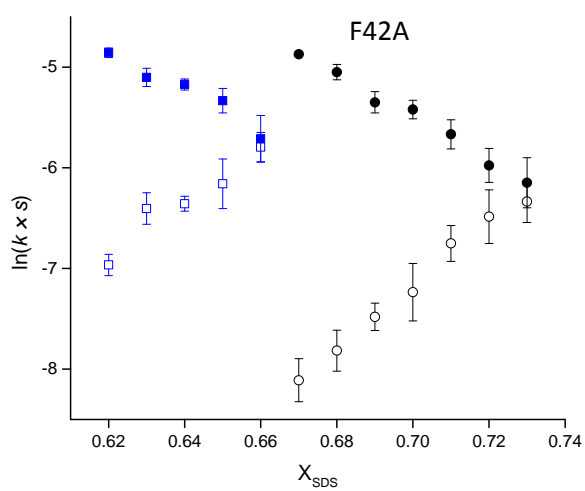**F**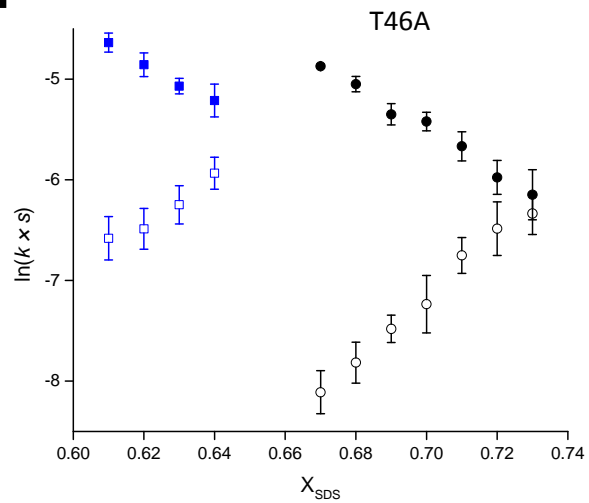



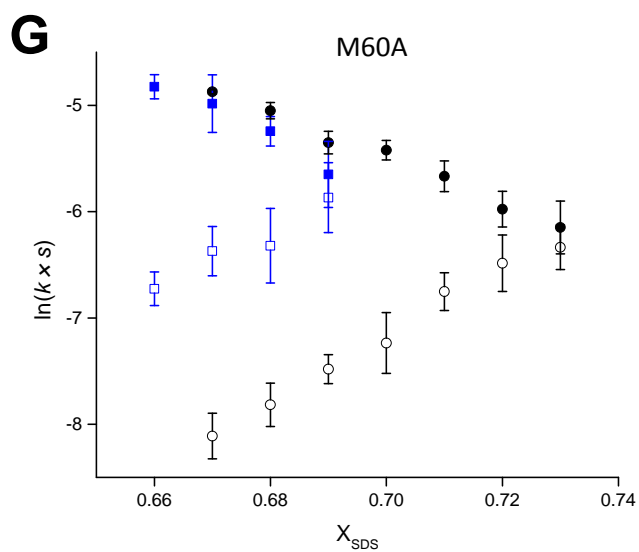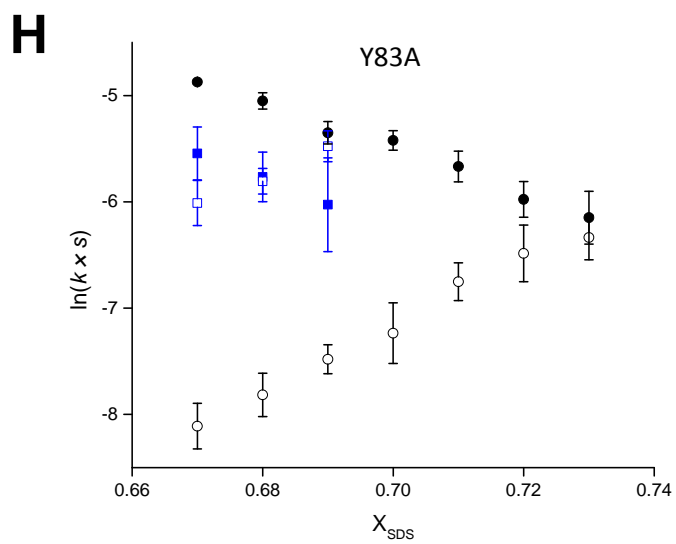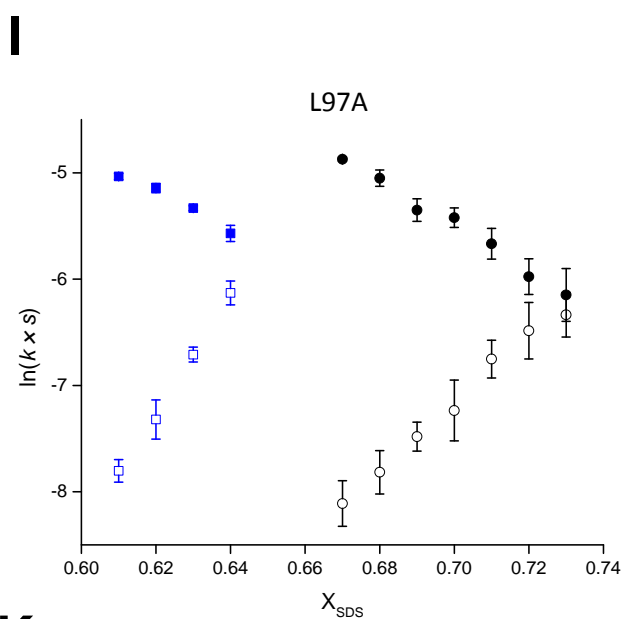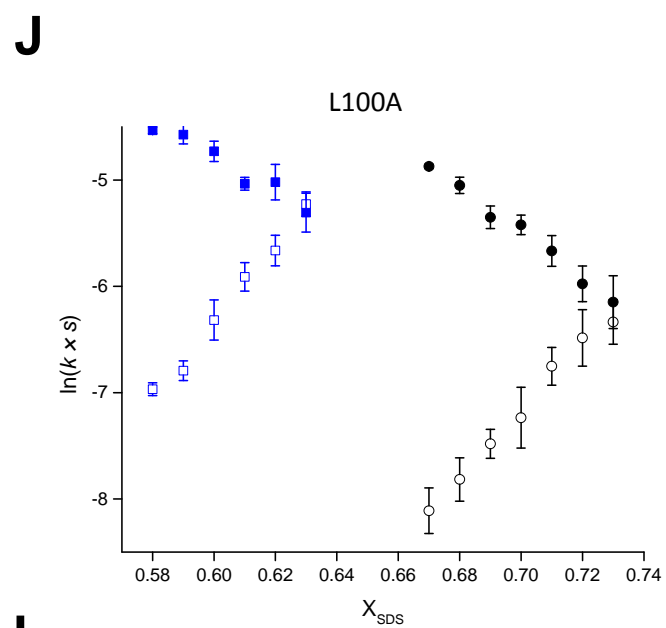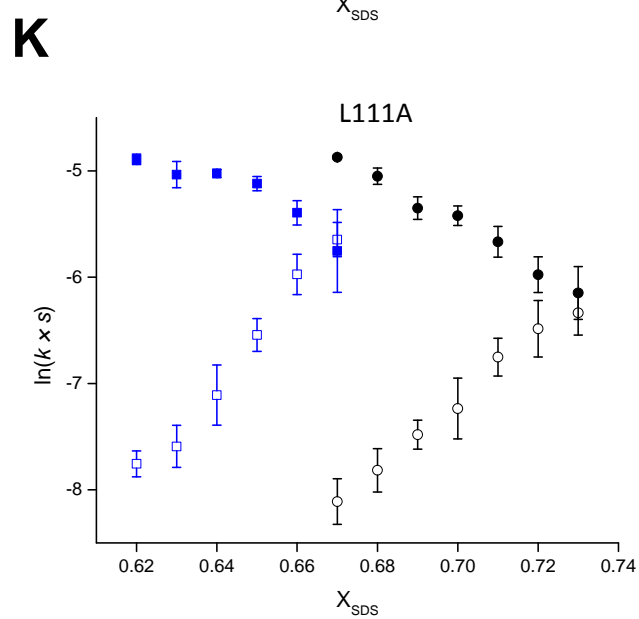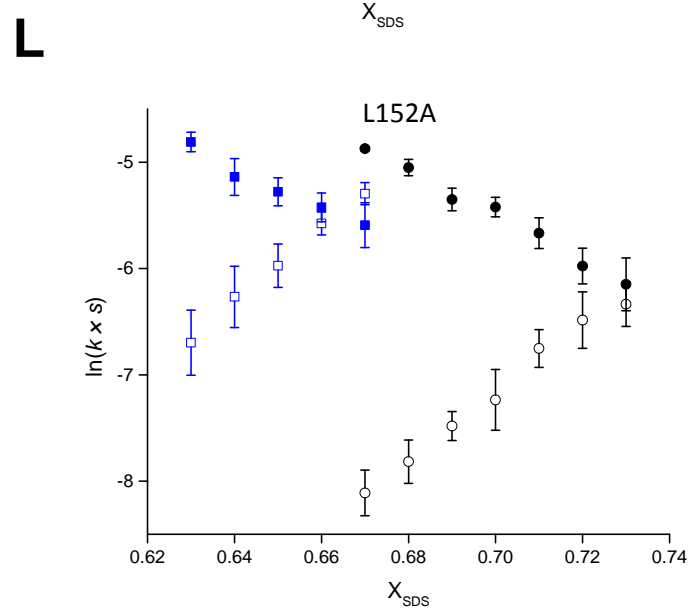

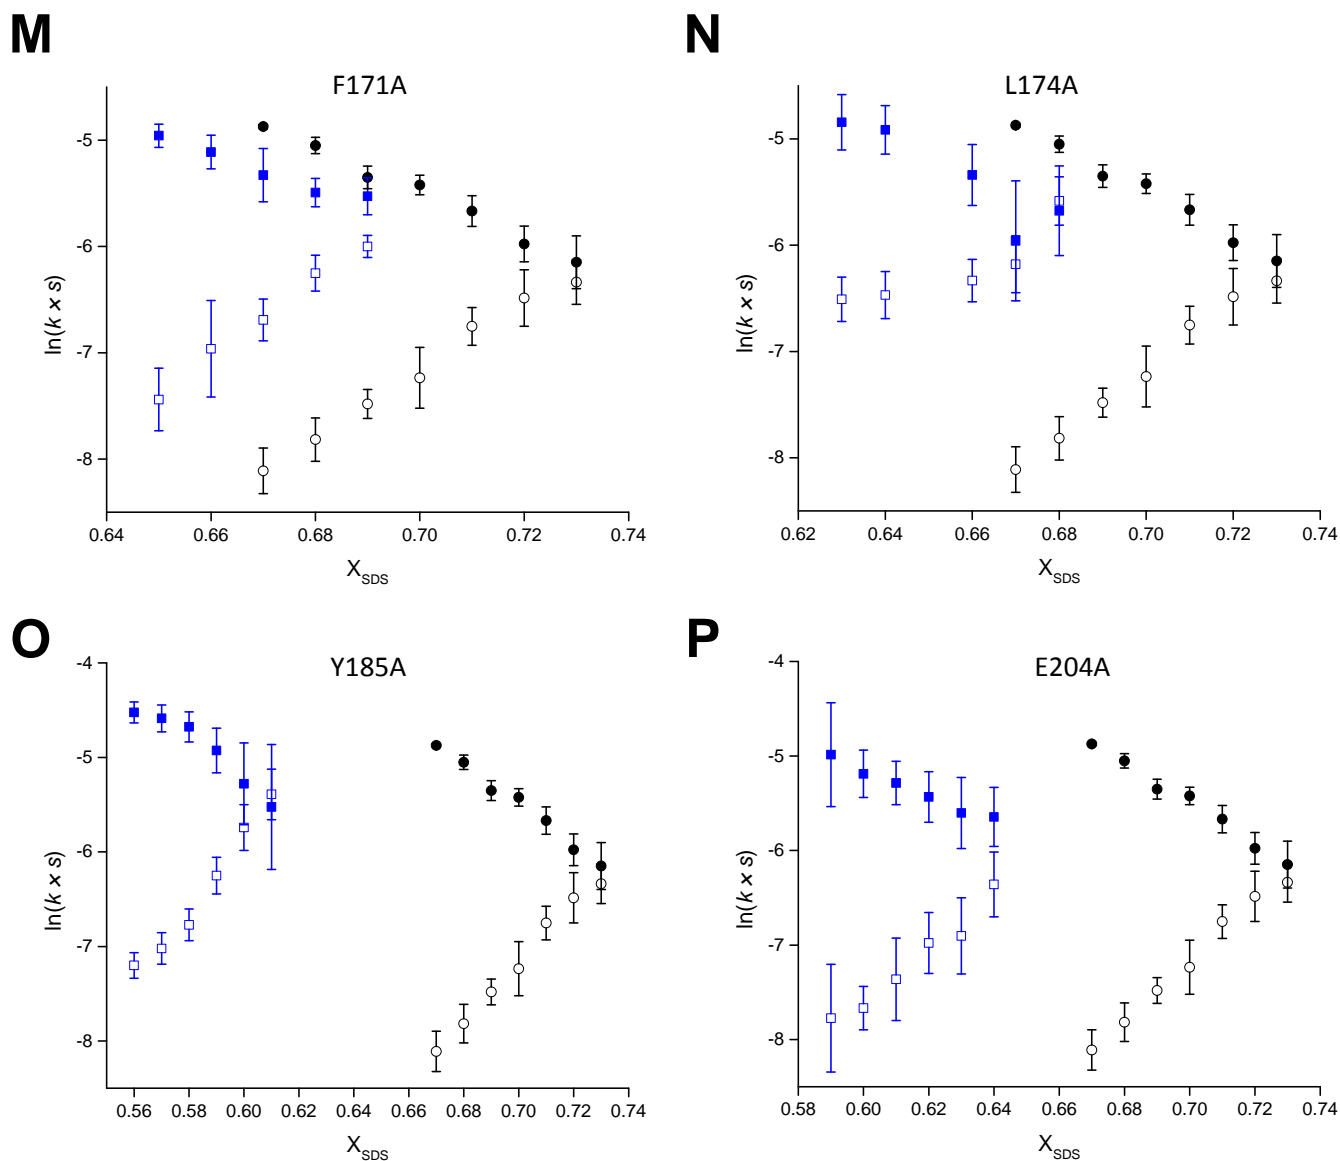

**Figure S5. The extracted rates constants of the bR mutants used for  $\phi$ -value analysis.** The natural log of  $k_f$  (filled blue squares) and  $k_u$  (open blue squares) of the bR mutants are plotted with the natural log of  $k_f$  (filled black circles) and  $k_u$  (open black circles) of wild-type bR for reference. (A) L13A (B) M20A (C) F27A (D) K41A (E) F42A (F) T46A (G) M60A (H) Y83A (I) L97A (J) L100A (K) L111A (L) L152A (M) F171A (N) L174A (O) Y185A (P) E204A

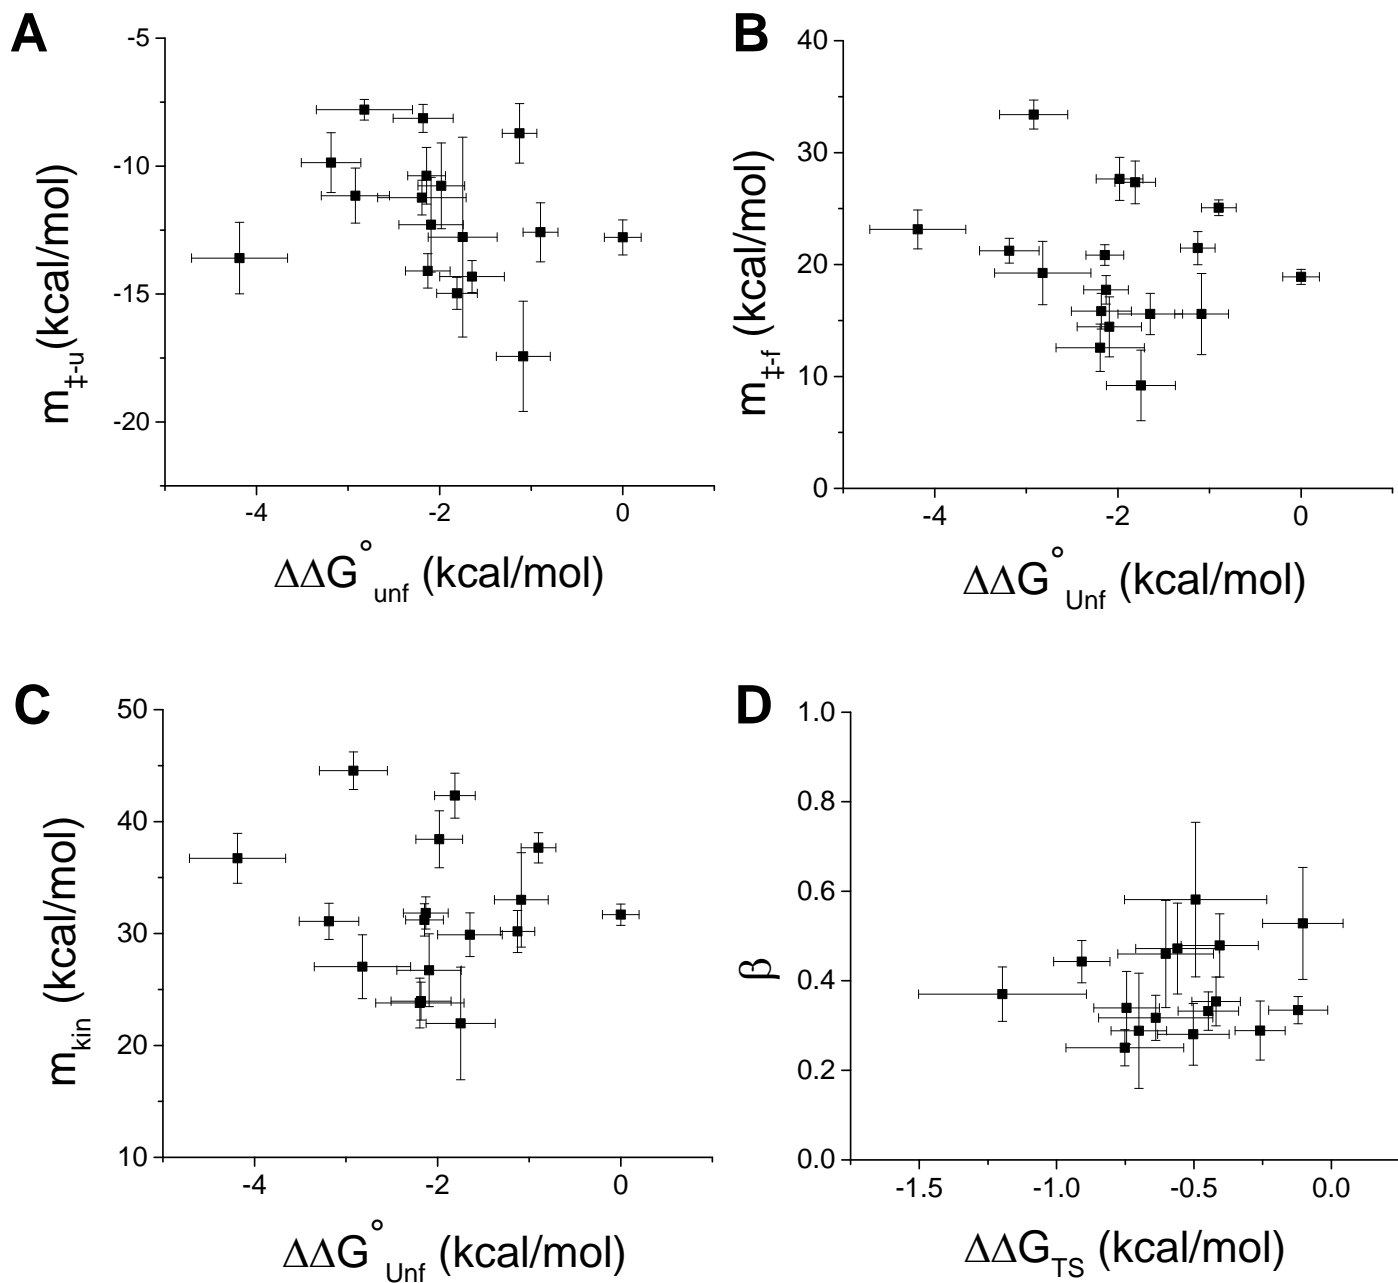

**Figure S6. Lack of dependence of the folding and unfolding behavior of bR on the degree of destabilization upon mutation.** (A) No effect of destabilization on the folding slope (B) No effect of destabilization on unfolding slope. (C) No effect of destabilization on the kinetic  $m$ -value (D) No correlation between the change in folding rate and  $\beta$ -value.
